# Supplementary material for: Differential Gene Expression Profile of Human Neutrophils Cultured withPlasmodium falciparum-Parasitized Erythrocytes
Source: Hindawi journal article supplement (doi:10.1155/2018/6709424), 2018-07-05
Supplement: f1 [file 6709424.f1.pdf]

## Differential gene expression profile of neutrophils phagocytizing *Plasmodium falciparum*-parasitized erythrocytes

Mohamad Alaa Terkawi<sup>1,2</sup>, Ryo Takano<sup>1</sup>, Kentaro Kato<sup>1,3,\*</sup>

<sup>1</sup>National Research Center for Protozoan Diseases, Obihiro University of Agriculture and Veterinary Medicine, Inada-cho, Obihiro, Hokkaido 080-8555, Japan. <sup>2</sup>Department of Orthopedic Surgery, Faculty of Medicine and Graduate School of Medicine, Hokkaido University, Kita-15, Nish-7, Kita-ku, Sapporo, 060-8638, Japan. <sup>3</sup>Research Center for Global Agromedicine, Obihiro University of Agriculture and Veterinary Medicine, Inada-cho, Obihiro, Hokkaido 080-8555, Japan.

### Supplementary Materials

**Table S1. Primers used in this study.**

| Gene           | Forward (5'→3')       | Reverse (5'→3')         |
|----------------|-----------------------|-------------------------|
| <i>RIT2</i>    | AAGCACCTGACACGGGTG    | GAGGGACCGGAGGAAAAAAA    |
| <i>MLLT10</i>  | CTACCCCTCTCACCCACACAA | TGGCATTGGATGTGTTGCA     |
| <i>CTSLR</i>   | ACAGGGAAGGGAAACACAGCT | TGTCTCAAAGGCGTTCATG     |
| <i>CXCL10</i>  | CCAGAATCGAAGGCCATCAA  | CCTTTCCTTGCTAACTGCTTTCA |
| <i>CYGB</i>    | GGTCATTCTGGAGGTGGTCG  | TCAGGTGGGAAGTCACTGGC    |
| <i>ELN1</i>    | GGTATCCCATCAAGGCCCC   | AGTTTCCCTGTGGTGTAGGG    |
| <i>IRG1</i>    | TGAAGTGCAAGGCCGATTACT | GGCATGTCATTGGCCTCCT     |
| <i>SOCS3</i>   | ACCTTTCTGATCCGCGACAG  | GCTGAGCGTGAAGAAGTGGC    |
| <i>CD64</i>    | AGAGGCCTGGTTTGCAGCTT  | GGGTCTTGCTGCCCATGTAG    |
| <i>CISH</i>    | GAGGATCTGCTGTGCATAGCC | GCCAGATTCCCGAAGGTAGG    |
| <i>VIT</i>     | GGATGCCAAGACCCCAAATA  | GGATGCATACACGTCAGTGCC   |
| <i>B-actin</i> | CCTCACCCCTGAAGTACCCCA | TCGTCCCAGTTGGTGACGAT    |

**Table S 2. GO terms for molecular function and biological process of the genes upregulated in PMNs phagocytizing iRBCs.**

| <b>GO terms</b>                        | <b>ID</b>  | <b>Count</b> | <b>P value</b> | <b>Genes</b>                                                                               |
|----------------------------------------|------------|--------------|----------------|--------------------------------------------------------------------------------------------|
| <b>Molecular function</b>              |            |              |                |                                                                                            |
| <b>Kinase regulator activity</b>       | GO:0019207 | 5            | 0.0024         | CXCL10, CDK5RAP1, CISH2, MAPK8IP2, SOCS3                                                   |
| <b>Signal transducer activity</b>      | GO:0004871 | 12           | 0.012          | CD69, FCGR1A, GPR88, MRGPRF, MRGPRG, FLNA, FFAR3, GABRQ, HCAR1, IL15R, KRT17, P2RY4, FFAR3 |
| <b>Receptor activity</b>               | GO:0004872 | 11           | 0.024          | CD69, FCGR1A, GPR88, MRGPRF, MRGPRG, FLNA, FFAR3, GABRQ, HCAR1, IL15R, KRT17, P2RY4, TFR2  |
| <b>Molecular transducer activity</b>   | GO:0060089 | 11           | 0.024          | CD69, FCGR1A, GPR88, MRGPRF, MRGPRG, FLNA, FFAR3, GABRQ, HCAR1, IL15R, KRT17, P2RY4, TFR2  |
| <b>Carbohydrate derivative binding</b> | GO:0097367 | 13           | 0.028          | CXCL10, RIT2, WNK4, CTSL, CCT3, FLNA, NMNAT1, NOS3, P2RY4, RPS6KA2, SEPHS2, TFR2, VIT      |
| <b>Cytokine receptor activity</b>      | GO:0004896 | 6            | 0.0345         | CXCL10, SOCS3, CISH, IL15RA, IL1A, NOS3                                                    |
| <b>Glycoprotein binding</b>            | GO:0001948 | 3            | 0.038          | CTSL, FLNA, TFR2                                                                           |

| <b>Biological process</b>                     |            |    |         |                                                                                                                                                                                                                                                                              |
|-----------------------------------------------|------------|----|---------|------------------------------------------------------------------------------------------------------------------------------------------------------------------------------------------------------------------------------------------------------------------------------|
| <b>Cellular response to cytokine stimulus</b> | GO:0071345 | 7  | 0.00177 | IL15RA, IL1A, CISH, FCGR1A, SOCS3, CXCL10, IRG1                                                                                                                                                                                                                              |
| <b>Cytokine-mediated signaling pathway</b>    | GO:0019221 | 6  | 0.0023  | IL15RA, IL1A, CISH, FCGR1A, SOCS3, CXCL10                                                                                                                                                                                                                                    |
| <b>Response to cytokine</b>                   | GO:0034097 | 7  | 0.0041  | IL15RA, IL1A, CISH, FCGR1A, SOCS3, CXCL10, IRG1                                                                                                                                                                                                                              |
| <b>Signaling</b>                              | GO:0023052 | 27 | 0.0044  | P2RY4, IL15RA, HCAR1, FFAR3, CPNE6, IL1A, GABRQ, CNIH2, WNK4, CISH, RPS6KA2, FCGR1A, TFR2, SLC1A7, KRT17, RIT2, ERLIN1, GPR88, FLNA, MAPK8IP2, SOCS3, CTSL, CXCL10, MRGPRF, MRGPRG, ANKS1A, IRG1                                                                             |
| <b>Regulation of cellular process</b>         | GO:0050794 | 38 | 0.0067  | P2RY4, IL15RA, HCAR1, FFAR3, CPNE6, IL1A, GABRQ, MGA, BATF2, SPIRE1, CNIH2, WNK4, CISH, RPS6KA2, HLX, FCGR1A, TFR2, FAM132B, KRT17, RIT2, ERLIN1, GPR88, FLNA, ZSCAN2, VIT, MAPK8IP2, SOCS3, MLLT10, CTSL, CDK5RAP1, CXCL10, IKZF4, HAS1, MRGPRF, CYGB, MRGPRG, ANKS1A, IRG1 |

|                              |            |    |        |                                                                                                                                                                                                                                                                           |
|------------------------------|------------|----|--------|---------------------------------------------------------------------------------------------------------------------------------------------------------------------------------------------------------------------------------------------------------------------------|
| <b>Cell communication</b>    | GO:0007154 | 27 | 0.0075 | P2RY4, IL15RA, HCAR1, FFAR3, CPNE6, IL1A, GABRQ, CNIH2, WNK4, CISH, RPS6KA2, FCGR1A, TFR2, SLC1A7, KRT17, RIT2, ERLIN1, GPR88, FLNA, MAPK8IP2, SOCS3, CTSL, CXCL10, MRGPRF, MRGPRG, ANKS1A, IRG1                                                                          |
| <b>Defense response</b>      | GO:0006952 | 11 | 0.0096 | HCAR1, FFAR3, IL1A, BATF2, RPS6KA2, FCGR1A, MAPK8IP2, SOCS3, CTSL, CXCL10, IRG1                                                                                                                                                                                           |
| <b>Response to stimulus</b>  | GO:0050896 | 33 | 0.0130 | CXCL10, CDK5RAP1, ERLIN1, FCGR1A, GPR88, HLX, IKZF4, MRGPRF, MRGPRG, MGA, RIT2, WNK4, ANKS1A, BATF2, CTSL, CPNE6, CNIH2, CYGB, CISH, ELN, FLNA, FFAR3, GABRQ, HAS1, HCAR1, IL1A, IL15RA, KRT17, LETM1, MAPK8IP2, MLLT10, P2RY4, RPS6KA2, SPIRE1, SOCS3, TFR2, VIT, ZSCAN2 |
| <b>Biological regulation</b> | GO:0065007 | 38 | 0.0170 | CXCL10, ERLIN1, FCGR1A, GPR88, HLX, MRGPRF, MRGPRG, RIT2, WNK4, ANKS1A, BATF2, CTSL, CPNE6, CNIH2, CYGB, CISH, FLNA, FFAR3, GABRQ, HAS1, HCAR1, IL1A, IL15RA, KRT14, KRT17, MAPK8IP2, NMNAT1, P2RY4, RPS6KA2, SOCS3, TFR2                                                 |

---

**Table S 3. GO terms for molecular function and biological process of the genes downregulated in PMNs phagocytizing iRBCs.**

| <b>GO terms</b>                        | <b>ID</b>  | <b>Count</b> | <b>P value</b> | <b>Genes</b>                                                                                                                                                                                                                                                                                                                                                                                                                                                                                 |
|----------------------------------------|------------|--------------|----------------|----------------------------------------------------------------------------------------------------------------------------------------------------------------------------------------------------------------------------------------------------------------------------------------------------------------------------------------------------------------------------------------------------------------------------------------------------------------------------------------------|
| <b>Molecular function</b>              |            |              |                |                                                                                                                                                                                                                                                                                                                                                                                                                                                                                              |
| <b>Oxygen binding</b>                  | GO:0019825 | 5            | 2.71561E-05    | HBA2, HBM, HBG1, HBD, HBB                                                                                                                                                                                                                                                                                                                                                                                                                                                                    |
| <b>Organic cyclic compound binding</b> | GO:0097159 | 68           | 7.54699E-05    | ZNF12, BCOR, MBD4, NEK6, KIAA0907, ZNF3, ZNF766, SP3, SMG6, DIDO1, STK17B, ZNF627, DOT1L, HBA2, ERN1, ZNF217, HBM, SNAI3, HBG1, ZNF592, CLK4, SYNJ2, RNASET2, ZNF518B, ZNF350, GPANK1, P2RY2, VSIG8, SF1, ALAS2, RHOB, STK17A, THUMPD3, ZNF322, ZNF100, RHOBTB2, DNAJA2, ATP7A, RAC1, OTX1, PLAGL2, KCTD12, LTB4R, PHC2, THAP1, HBD, CEBPE, POLM, TCEANC, BUD13, NLRC4, VEZF1, AKNA, DCAF13, HEY1, TIGD3, NKX3-1, NLRP12, SRXN1, HBB, RAB39B, AK3, ZFP36L2, SNAI1, NUA2, HIC1, ZNF277, UBE2C |

|                                                                                                 |            |    |             |                                                                                                                                                                                                                                                                                     |
|-------------------------------------------------------------------------------------------------|------------|----|-------------|-------------------------------------------------------------------------------------------------------------------------------------------------------------------------------------------------------------------------------------------------------------------------------------|
| <b>Cysteine-type<br/>endopeptidase activator<br/>activity involved in<br/>apoptotic process</b> | GO:0008656 | 3  | 0.000361589 | NKX3-1, NLRP12, CARD8                                                                                                                                                                                                                                                               |
| <b>Endonuclease activity</b>                                                                    | GO:0004519 | 6  | 0.000364607 | MBD4, SMG6, RPP38, ERN1, RNASET2, PELO                                                                                                                                                                                                                                              |
| <b>Peptidase activator<br/>activity involved in<br/>apoptotic process</b>                       | GO:0016505 | 3  | 0.000499351 | NKX3-1, NLRP12, CARD8                                                                                                                                                                                                                                                               |
| <b>Endoribonuclease<br/>activity</b>                                                            | GO:0004521 | 4  | 0.000649157 | SMG6, RPP38, ERN1, RNASET2                                                                                                                                                                                                                                                          |
| <b>Cation binding</b>                                                                           | GO:0043169 | 48 | 0.001988043 | ZNF12, NEK6, ZNF3, ZNF766, SP3, SMG6, RNF144B, DIDO1,<br>ZNF627, HBA2, ERN1, ZNF217, HBM, SNAI3, HBG1, ZNF592,<br>ZNF518B, ZNF350, SF1, ALAS2, ZNF322, RRM2B, ZNF100,<br>ZNF830, DNAJA2, ATP7A, PLAGL2, PHF12, TKTL1, PHC2,<br>THAP1, HBD, CAPN15, POLM, NLRC4, VEZF1, THBD, CBLL1, |

|                           |            |    |             |                                                                                                                                                                                                                                                                                                                                          |
|---------------------------|------------|----|-------------|------------------------------------------------------------------------------------------------------------------------------------------------------------------------------------------------------------------------------------------------------------------------------------------------------------------------------------------|
|                           |            |    |             | INPP1, HBB, PELO, EFCAB1, ZFP36L2, SNAI1, NUAK2, HIC1, NOTCH2NL, ZNF277                                                                                                                                                                                                                                                                  |
| <b>DNA binding</b>        | GO:0003677 | 32 | 0.00217988  | ZNF12, BCOR, MBD4, ZNF3, ZNF766, SP3, SMG6, ZNF627, DOT1L, ZNF217, SNAI3, ZNF592, ZNF518B, ZNF350, ZNF322, ZNF100, OTX1, PLAGL2, PHC2, THAP1, CEBPE, POLM, TCEANC, VEZF1, AKNA, HEY1, TIGD3, NKX3-1, ZFP36L2, SNAI1, HIC1, ZNF277                                                                                                        |
| <b>Metal ion binding</b>  | GO:0046872 | 47 | 0.002187932 | ZNF12, NEK6, ZNF3, ZNF766, SP3, SMG6, RNF144B, DIDO1, ZNF627, HBA2, ERN1, ZNF217, HBM, SNAI3, HBG1, ZNF592, ZNF518B, ZNF350, SF1, ZNF322, RRM2B, ZNF100, ZNF830, DNAJA2, ATP7A, PLAGL2, PHF12, TKTL1, PHC2, THAP1, HBD, CAPN15, POLM, NLRC4, VEZF1, THBD, CBLL1, INPP1, HBB, PELO, EFCAB1, ZFP36L2, SNAI1, NUAK2, HIC1, NOTCH2NL, ZNF277 |
| <hr/>                     |            |    |             |                                                                                                                                                                                                                                                                                                                                          |
| <b>Biological process</b> |            |    |             |                                                                                                                                                                                                                                                                                                                                          |
| <hr/>                     |            |    |             |                                                                                                                                                                                                                                                                                                                                          |
| <b>Oxygen transport</b>   | GO:0015671 | 5  | 1.10817E-07 | HBA2, HBM, HBG1, HBD, HBB                                                                                                                                                                                                                                                                                                                |

|                                                         |            |    |             |                                                                                                                                                                                                                                                                                                                                                                                                                                                                                                                                                                                                                                                                                                              |
|---------------------------------------------------------|------------|----|-------------|--------------------------------------------------------------------------------------------------------------------------------------------------------------------------------------------------------------------------------------------------------------------------------------------------------------------------------------------------------------------------------------------------------------------------------------------------------------------------------------------------------------------------------------------------------------------------------------------------------------------------------------------------------------------------------------------------------------|
| <b>Cellular<br/>macromolecule<br/>metabolic process</b> | GO:0044260 | 92 | 3.25673E-07 | NAT9, ZNF12, PILRB, DNAJC3, BCOR, FHOD1, MBD4, NEK6,<br>ASB2, RGS3, ZNF3, ZNF766, SP3, SMG6, RPP38, RNF144B,<br>ARRDC3, DIDO1, STK17B, ZNF627, DOT1L, PDRG1, ERN1,<br>ZNF217, CLN3, SNAI3, ZNF592, SLC9A1, CLK4, SYNJ2,<br>RNASET2, ZNF518B, ZNF350, SF1, ALAS2, ARRDC4, STK17A,<br>ZNF322, RRM2B, NAB2, ZNF100, ZNF830, DNAJB5, DNAJA2,<br>MGAT3, ATP7A, RAC1, OTX1, HECW2, PLAGL2, PHF12,<br>DUSP28, PHLDA1, PHC2, AKTIP, TXNIP, THAP1, CAPN15,<br>CEBPE, POLM, TCEANC, ENC1, BUD13, RFT1, NLRC4, VEZF1,<br>TBCC, AKNA, DCAF13, BCDIN3D, HEY1, NKX3-1, CBLL1, ID2,<br>DBNL, NLRP12, INPP1, PHLDA2, CARD8, PELO, ZFP36L2,<br>TLE4, RPRD1A, SNAI1, NUA2, HIC1, FADD, FUT4, STX1A,<br>ZNF277, UBE2C, SERPINB8 |
| <b>Cell death</b>                                       | GO:0008219 | 32 | 2.64595E-05 | DNAJC3, NEK6, RNF144B, DIDO1, STK17B, HBA2, ERN1, CLN3,<br>SLC9A1, TNFRSF12A, RHOB, STK17A, RRM2B, ATP7A, RAC1,<br>PLAGL2, PHLDA1, AKTIP, TXNIP, NLRC4, PNMA5, FAM134B,                                                                                                                                                                                                                                                                                                                                                                                                                                                                                                                                      |



|                                   |            |    |             |                                                                                                                                                                                                                                                                                                                                                                                                                                                                                      |
|-----------------------------------|------------|----|-------------|--------------------------------------------------------------------------------------------------------------------------------------------------------------------------------------------------------------------------------------------------------------------------------------------------------------------------------------------------------------------------------------------------------------------------------------------------------------------------------------|
|                                   |            |    |             | NKX3-1, DBNL, NLRP12, PHLDA2, HBB, CARD8, SNAI1, NUAK2, HIC1, FADD                                                                                                                                                                                                                                                                                                                                                                                                                   |
| <b>Apoptotic process</b>          | GO:0006915 | 30 | 5.16586E-05 | DNAJC3, NEK6, RNF144B, DIDO1, STK17B, ERN1, CLN3, SLC9A1, TNFRSF12A, RHOB, STK17A, RRM2B, ATP7A, RAC1, PLAGL2, PHLDA1, AKTIP, TXNIP, NLRC4, PNMA5, FAM134B, NKX3-1, DBNL, NLRP12, PHLDA2, CARD8, SNAI1, NUAK2, HIC1, FADD                                                                                                                                                                                                                                                            |
| <b>Cellular metabolic process</b> | GO:0044237 | 99 | 5.93162E-05 | NAT9, ZNF12, PILRB, DNAJC3, BCOR, FHOD1, MBD4, NEK6, ASB2, RGS3, ZNF3, ZNF766, SP3, SMG6, RPP38, RNF144B, ARRDC3, DIDO1, STK17B, ZNF627, DOT1L, MID1IP1, HBA2, PDRG1, ERN1, ZNF217, CLN3, SNAI3, ZNF592, SLC9A1, CLK4, SYNJ2, RNASET2, ZNF518B, ZNF350, SF1, ALAS2, ARRDC4, STK17A, ZNF322, RRM2B, NAB2, ZNF100, ZNF830, DNAJB5, DNAJA2, MGAT3, ATP7A, RAC1, OTX1, HECW2, PLAGL2, PHF12, DUSP28, PHLDA1, TKTL1, PHC2, AKTIP, TXNIP, THAP1, CAPN15, CEBPE, POLM, TCEANC, ENC1, BUD13, |

RFT1, NLRC4, VEZF1, TBCC, AKNA, DCAF13, BCDIN3D, HEY1,  
FAM134B, NKX3-1, CBLL1, ID2, DBNL, NLRP12, INPP1,  
PHLDA2, HBB, CARD8, PELO, AK3, ZFP36L2, TLE4, COX19,  
RPRD1A, SNAI1, NUAK2, HIC1, FADD, FUT4, STX1A, ZNF277,  
UBE2C, SERPINB8

---
